# Supplementary material for: Vertical jump performance in recreational runners with visual impairment: a cross-sectional study
Source: PeerJ. 2025 Mar 18;13:e19059. doi: 10.7717/peerj.19059 (PMC11927559; doi:10.7717/peerj.19059)
Supplement: Supplemental Information 1 [file peerj-13-19059-s001.xlsx]

## Sheet: Sheet1
	Subject informations					SJ					CMJ
Subject	Visual classification	Age (years)	Height (m)	Body mass (kg)	Training load (hours per week)	Height (cm)	Power (W/kg)	Hip angle (°)	Knee angle (°)	Ankle angle (°)	Height (cm)	Power (W/kg)	Hip angle (°)	Knee angle (°)	Ankle angle (°)
1	B3	27	1.78	90.1	12	20.6	31.1	91.4	82.4	81	17.8	26.2	86.4	81.4	80.4
2	B2	31	1.75	58	2	15.1	31.2	107.2	96.8	88.8	10.5	21.1	79	86.6	91.8
3	B1	24	1.69	63.1	10	15.1	26.2	99	88.2	89.2	5.79	14.2	88.8	87.4	90.8
4	B1	50	1.63	63	2	7.76	15.5	89.4	95.8	87.4	5.08	11.9	88	91.6	87.8
5	B2	28	1.64	68.6	3	12.8	22.1	83.2	89.6	91.8	17.3	26.9	92.2	94	94
6	B1	52	1.77	69	4	20.2	29.3	70	77.6	89.6	14.1	23.8	67.2	69.2	85.2
7	B1	17	1.59	41.3	2	22.2	30.6	75.2	87	81.8	20.1	35.3	69	86.8	83.8
8	B3	42	1.65	59.4	4	20.3	31.4	78.8	87.4	87.4	17.8	28.4	77	82.2	89.8
